# Supplementary material for: ABCD1 Transporter Deficiency Results in Altered Cholesterol Homeostasis
Source: MDPI journal article supplement (doi:10.3390/biom13091333), 2023-08-31
Supplement: s1 [file s1]

# Supplementary Materials

## ABCD1 Transporter Deficiency Results in Altered Cholesterol Homeostasis

Agnieszka Buda, Sonja Forss-Petter, Rong Hua, Yorrick Jaspers, Mark Lassnig, Petra Waidhofer-Söllner, Stephan Kemp, Peter Kim, Isabelle Weinhofer and Johannes Berger

### List of supplementary materials:

1. Supplementary Table S1. Primers used in RT-qPCR gene expression analysis.
2. Supplementary Table S2. Raw data from the lipidomic analysis of cholesterol ester-fatty acid species in human control and X-ALD fibroblasts.
3. Supplementary Table S3. Raw data from the lipidomic analysis of cholesterol ester-fatty acid species in the brain tissue of WT and *Abcd1* KO mice.
4. Supplementary Table S4. Raw data from the lipidomic analysis of cholesterol ester-fatty acid species in the spinal cord tissue of WT and *Abcd1* KO mice.
5. Supplementary Table S5. *P*-values of *t*-tests comparing the effect of cholesterol condition on gene expression within the control and X-ALD genotype groups.
6. Supplementary Figure S1. Lipidomic analysis of cholesterol ester-fatty acid species in human control and X-ALD fibroblasts and in the CNS of WT and *Abcd1* KO mice.
7. Supplementary Figure S2. Lipidomic analysis of triglyceride-fatty acid species in human control and X-ALD fibroblasts.
8. Supplementary Figure S3. Cholesterol triggers proper regulation of the SREBP2 pathway in control and X-ALD fibroblasts at the mRNA level.
9. Supplementary Figure S4. Dysregulated cholesterol-associated gene expression in X-ALD is aggravated by combined cholesterol and 25-HC exposure.
10. Supplementary Figure S5. LXR agonist TO901317 does not reduce the levels of the most significantly accumulating CE-VLCFA species, CE(26:0) and CE(26:1), in the CNS of X-ALD mice.
11. Supplementary Figure S6. Increased induction of LDs is manifest in X-ALD fibroblasts already after 24 h of cholesterol loading.
12. Supplementary Figure S7. ABCD1 protein levels in various X-ALD-derived fibroblast lines.
13. Supplementary Figure S8. Progesterone triggers LD lipolysis in fibroblasts without affecting the expression of genes associated with the cortisol pathway.

# Supplementary Table S1

**Supplementary Table S1. Primers used in RT-qPCR gene expression analysis**

| Gene          | Primer sequence                                                                |
|---------------|--------------------------------------------------------------------------------|
| <b>Human</b>  |                                                                                |
| <i>ABCA1</i>  | Forward: 5'-tgtctgggatatgtgcaattacg-3'<br>Reverse: 5'-gcttattgtcggagaacagct-3' |
| <i>HMGCR</i>  | Forward: 5'-accttccagagcaagcaca-3'<br>Reverse: 5'-ctgacgtaccctgacatgg-3'       |
| <i>HPRT</i>   | Forward: 5'-ccctggcgtcgtgattagt-3'<br>Reverse: 5'-caggtcagcaagaatttatagcc-3'   |
| <i>LDLR</i>   | Forward: 5'-gaggaactgcgctgtgg-3'<br>Reverse: 5'-tgtcacattaacgcagccaac-3'       |
| <i>NCEH1</i>  | Forward: 5'-tgcccttggaacagtttact-3'<br>Reverse: 5'-ttcaccatgacatagcgggg-3'     |
| <i>PLIN2</i>  | Forward: 5'-atcagccatcaactcagattgtt-3'<br>Reverse: 5'-ggcttgcctcaccctg-3'      |
| <i>SOAT1</i>  | Forward: 5'-atcttgccaggtgtgctgat-3'<br>Reverse: 5'-acatcctgtcacaaagcgt-3'      |
| <i>SREBP2</i> | Forward: 5'-tgccctcaagtaccaacc-3'<br>Reverse: 5'-gggtgtccgcctttctcctt-3'       |
| <b>Mouse</b>  |                                                                                |
| <i>Abca1</i>  | Forward: 5'-tgaagccagttgtgacaaaac-3'<br>Reverse: 5'-agaaacatcacctcctgccg-3'    |
| <i>Apoe</i>   | Forward: 5'-tgtttcggaaggagctgact-3'<br>Reverse: 5'-tgtgtgacttgggagctctg-3'     |
| <i>Hmgcr</i>  | Forward: 5'-caccatgtcaggcgtccg-3'<br>Reverse: 5'-ctaggaccagcgacacacag-3'       |
| <i>Hprt</i>   | Forward: 5'-acttcagggtttgaatcacgtt-3'<br>Reverse: 5'-gcagatggccacaggactaga-3'  |
| <i>Soat1</i>  | Forward: 5'-cgagacaactaccaaggactc-3'<br>Reverse: 5'-acatcctgtcacaaagcgt-3'     |

# Supplementary Table S2

**Supplementary Table S2. Raw data from the lipidomic analysis of cholesterol ester-fatty acid species in human control and X-ALD fibroblasts.**

| Phenotype  | Control 1  | Control 2  | Control 3  | Control 4  | Control 5  | Control 6  | Control 7  | Control 8  | X-ALD 1   | X-ALD 2    | X-ALD 3    | X-ALD 4    | X-ALD 5    | X-ALD 6    | X-ALD 7    | X-ALD 8    |
|------------|------------|------------|------------|------------|------------|------------|------------|------------|-----------|------------|------------|------------|------------|------------|------------|------------|
| Metabolite |            |            |            |            |            |            |            |            |           |            |            |            |            |            |            |            |
| CE(16:0)   | 640.8370   | 675.3150   | 387.4170   | 360.1410   | 1048.9500  | 2130.4300  | 891.0750   | 972.3110   | 247.7140  | 695.7330   | 701.1130   | 667.7050   | 809.4210   | 795.8980   | 1244.4700  | 334.9710   |
| CE(16:1)   | 2213.7300  | 2189.5000  | 1432.4900  | 1234.5500  | 3408.4100  | 6243.6500  | 2563.4700  | 3047.5200  | 948.2620  | 2439.1600  | 2831.5400  | 2494.8600  | 2420.9400  | 2629.3300  | 3217.5100  | 1321.2300  |
| CE(16:2)   | 92.2952    | 112.3510   | 69.3092    | 58.6393    | 160.0360   | 259.2070   | 127.0430   | 145.8060   | 36.9689   | 124.0850   | 138.8870   | 106.5510   | 124.9670   | 130.1630   | 164.6540   | 63.6472    |
| CE(16:3)   | 83.8159    | 80.5740    | 37.0466    | 37.2292    | 83.4516    | 165.3760   | 64.2267    | 80.3569    | 30.1614   | 86.1458    | 95.2567    | 79.9353    | 104.5370   | 90.9781    | 111.8140   | 31.7312    |
| CE(17:0)   | 367.1850   | 312.7030   | 255.1140   | 231.1490   | 383.2670   | 709.2730   | 432.5440   | 569.2600   | 192.2530  | 313.3330   | 322.3580   | 293.9900   | 414.5410   | 436.8240   | 444.9440   | 221.8470   |
| CE(17:1)   | 1097.0000  | 984.2310   | 625.5160   | 605.8420   | 1553.8800  | 2910.0800  | 1246.4400  | 1618.5300  | 439.2370  | 1061.4500  | 1242.5800  | 997.5810   | 1278.1400  | 1062.4200  | 1749.4000  | 551.5000   |
| CE(17:2)   | 109.8490   | 54.6171    | 59.8684    | 39.0513    | 131.6810   | 209.1410   | 99.8090    | 117.7200   | 35.9395   | 99.8260    | 131.5370   | 83.8718    | 111.1450   | 146.8770   | 164.5330   | 30.9482    |
| CE(18:0)   | 132.0760   | 151.8620   | 74.3391    | 72.2870    | 274.4930   | 527.9500   | 139.2000   | 178.2420   | 41.9006   | 160.7320   | 244.2920   | 186.6460   | 234.6690   | 208.0900   | 318.7790   | 71.7513    |
| CE(18:1)   | 22075.1000 | 22739.6000 | 12136.8000 | 11774.2000 | 30637.7000 | 58492.6000 | 25702.8000 | 29603.5000 | 7744.6700 | 23622.9000 | 24758.8000 | 25481.3000 | 31030.1000 | 28342.6000 | 34929.5000 | 11490.0000 |
| CE(18:2)   | 10280.9000 | 10274.5000 | 6013.6700  | 5477.9700  | 15423.3000 | 29308.0000 | 10916.4000 | 13473.6000 | 3782.0900 | 12252.8000 | 12440.0000 | 12771.6000 | 15021.5000 | 11583.6000 | 18259.5000 | 5855.7000  |
| CE(18:3)   | 1855.4600  | 1936.2700  | 1134.8600  | 1100.1700  | 2579.0400  | 5165.9500  | 2220.8400  | 2202.6000  | 759.8430  | 2180.4400  | 1471.5100  | 2349.5800  | 2707.7500  | 2464.2200  | 3136.1700  | 1118.3300  |
| CE(18:4)   | 57.6727    | 54.0865    | 19.5234    | 16.0045    | 52.4509    | 108.1130   | 39.9797    | 24.9138    | 15.5482   | 66.1838    | 108.2850   | 52.8845    | 102.6110   | 111.1440   | 70.8919    | 23.5669    |
| CE(19:0)   | 102.5190   | 107.6280   | 66.7947    | 55.8178    | 159.5650   | 196.0830   | 110.3840   | 136.2400   | 38.5591   | 120.8860   | 74.7994    | 133.0870   | 154.8470   | 174.7220   | 195.0690   | 61.1650    |
| CE(19:1)   | 2741.1800  | 2565.8100  | 1788.4200  | 1750.4100  | 2844.9000  | 5149.2600  | 3160.7200  | 4214.3400  | 1257.4200 | 2193.1600  | 2863.0800  | 2394.4600  | 3662.6300  | 3690.9300  | 3191.1500  | 1521.1000  |
| CE(19:2)   | 1316.5100  | 1245.3100  | 730.5540   | 653.0880   | 1530.9200  | 2944.7900  | 1299.8900  | 1766.5100  | 468.6830  | 1218.0200  | 1525.5100  | 1388.8500  | 1787.4600  | 1733.3600  | 1855.3300  | 634.4800   |
| CE(19:3)   | 339.5230   | 284.2060   | 187.2540   | 156.9330   | 266.2360   | 518.8230   | 307.4560   | 391.3860   | 114.1750  | 308.1280   | 445.3570   | 380.1330   | 509.1600   | 514.3100   | 487.9460   | 149.9270   |
| CE(20:1)   | 332.4090   | 398.5960   | 146.4510   | 124.4050   | 398.8980   | 432.8040   | 301.2730   | 309.1760   | 100.4320  | 481.8440   | 422.6690   | 732.8010   | 840.1730   | 608.1200   | 543.9850   | 160.0760   |
| CE(20:2)   | 1168.7100  | 1192.4800  | 478.2410   | 477.8170   | 721.3690   | 1392.3400  | 883.5960   | 949.6360   | 321.0870  | 1068.4700  | 2143.4100  | 2870.7400  | 3316.4800  | 1824.7600  | 1035.0200  | 452.6440   |
| CE(20:3)   | 4628.7100  | 4852.4700  | 2031.5400  | 2017.8400  | 3471.5000  | 6855.7000  | 3585.0900  | 3266.6200  | 1128.4000 | 3733.4500  | 6848.6000  | 8314.4500  | 9958.3100  | 8565.4000  | 4337.4300  | 1777.6500  |
| CE(20:4)   | 15045.0000 | 15846.7000 | 9675.6400  | 9077.1100  | 19572.1000 | 36876.4000 | 16204.0000 | 18998.6000 | 6027.0600 | 16100.1000 | 18792.6000 | 19464.3000 | 22802.4000 | 22998.9000 | 24130.2000 | 8842.3600  |
| CE(20:5)   | 4767.2200  | 5141.6400  | 2270.5800  | 2218.5900  | 3507.2900  | 7383.0100  | 4181.0900  | 3979.7900  | 1398.5200 | 3550.0300  | 6690.9800  | 6012.7600  | 8277.9300  | 12339.4000 | 4925.9400  | 2119.3800  |
| CE(21:3)   | 612.3370   | 624.0660   | 274.1590   | 280.0820   | 426.2060   | 813.2460   | 437.7100   | 487.4080   | 172.2650  | 423.6340   | 799.2390   | 873.7130   | 1262.9100  | 1186.2400  | 529.1300   | 241.1870   |
| CE(21:4)   | 910.1130   | 877.5820   | 545.9660   | 496.4260   | 981.5320   | 1599.2400  | 936.8900   | 1432.9700  | 368.6470  | 638.6850   | 776.5490   | 788.2420   | 1131.8900  | 1370.7700  | 1262.7000  | 427.9620   |
| CE(21:5)   | 368.5470   | 385.7360   | 177.1910   | 148.9390   | 268.9820   | 468.4860   | 328.7460   | 403.9310   | 130.6980  | 231.5310   | 550.1310   | 371.9900   | 529.0700   | 1081.4300  | 353.7020   | 142.1940   |
| CE(22:1)   | 35.0068    | 42.3350    | 15.1288    | 14.8182    | 13.0149    | 29.8120    | 32.5092    | 31.6573    | 13.6065   | 57.9386    | 107.4100   | 123.0810   | 148.1410   | 81.1875    | 27.6727    | 16.1777    |
| CE(22:2)   | 87.9056    | 116.8900   | 34.5729    | 39.8173    | 44.3055    | 46.6524    | 61.0031    | 67.1814    | 24.9084   | 111.0620   | 255.2180   | 389.7250   | 518.7280   | 209.3730   | 67.9616    | 37.5278    |
| CE(22:3)   | 327.7750   | 364.2920   | 140.8190   | 146.1140   | 136.8490   | 311.6890   | 192.8170   | 233.0540   | 76.9061   | 296.2230   | 732.7040   | 1202.8100  | 1573.1000  | 842.1900   | 213.1630   | 106.8590   |
| CE(22:4)   | 1622.1100  | 1878.3700  | 885.4320   | 890.2350   | 626.4330   | 1236.7100  | 1079.4800  | 850.4520   | 283.9480  | 1003.1700  | 2684.2900  | 4145.8800  | 5323.9100  | 4214.7800  | 986.1300   | 447.6820   |
| CE(22:5)   | 8477.6000  | 9358.2900  | 3659.0300  | 3283.2200  | 3858.7200  | 7687.4300  | 5745.2100  | 4643.1000  | 1807.9100 | 6144.9600  | 10737.0000 | 15459.7000 | 19252.1000 | 14864.1000 | 3581.0000  | 2510.9900  |
| CE(22:6)   | 19282.4000 | 20955.2000 | 8909.4700  | 8311.5000  | 15917.9000 | 32178.9000 | 18430.6000 | 17779.1000 | 5378.7700 | 18298.0000 | 27613.0000 | 37628.4000 | 46863.7000 | 38027.9000 | 20503.2000 | 7865.1000  |
| CE(23:3)   | 50.1736    | 57.7956    | 19.4002    | 18.1300    | 24.1729    | 56.4219    | 31.3338    | 39.5737    | 7.8896    | 36.3444    | 108.5130   | 159.0940   | 185.5490   | 117.5660   | 26.8220    | 16.4646    |
| CE(24:1)   | 111.4690   | 139.5220   | 39.5155    | 38.0844    | 7.1206     | 74.4860    | 67.5318    | 80.5032    | 35.2591   | 169.0380   | 451.5310   | 344.3780   | 393.7840   | 293.8470   | 8.3021     | 45.7704    |
| CE(24:2)   | 46.9004    | 60.7257    | 18.5217    | 21.0977    | 8.5731     | 2.0743     | 25.8418    | 42.4632    | 18.4542   | 64.7836    | 162.7340   | 263.4520   | 297.9030   | 129.9680   | 29.5038    | 26.9176    |
| CE(24:3)   | 128.6980   | 156.1740   | 53.0350    | 60.2093    | 41.6874    | 91.8999    | 79.8557    | 93.5572    | 44.1379   | 153.0590   | 95.4858    | 612.0330   | 793.0340   | 401.0600   | 99.2142    | 53.0649    |
| CE(24:4)   | 238.9120   | 286.7260   | 104.6940   | 93.3102    | 85.4382    | 180.3860   | 150.8630   | 123.9670   | 43.4823   | 152.9410   | 478.1820   | 668.7160   | 868.8380   | 723.9210   | 120.0990   | 70.3184    |
| CE(24:5)   | 1393.7100  | 1577.6000  | 456.2170   | 459.0400   | 482.6170   | 1079.7600  | 943.2320   | 879.6760   | 239.8190  | 750.0420   | 2030.2800  | 3656.1000  | 4967.7300  | 3814.5300  | 639.2310   | 376.0420   |
| CE(24:6)   | 1258.5100  | 1407.7400  | 252.1630   | 250.1270   | 285.1800   | 659.9860   | 694.9560   | 546.7470   | 115.8740  | 783.9800   | 2742.9200  | 5903.2900  | 8197.9600  | 3397.0600  | 564.6100   | 197.0310   |
| CE(25:1)   | 36.4458    | 48.1008    | 15.1266    | 15.8942    | 9.5125     | 22.2198    | 30.7294    | 24.4729    | 11.4224   | 50.7554    | 125.3530   | 119.8110   | 156.1540   | 98.9595    | 21.4027    | 15.9591    |
| CE(25:3)   | 20.7697    | 29.7337    | 9.5110     | 14.7466    | 5.9914     | 16.0815    | 16.4437    | 20.0612    | 4.5392    | 31.5259    | 97.3905    | 176.8370   | 220.2590   | 75.2442    | 14.3433    | 9.5059     |
| CE(25:4)   | 19.1425    | 23.2932    | 11.9736    | 11.1386    | 11.9591    | 30.3109    | 21.0488    | 12.1315    | 3.3378    | 17.4018    | 19.6684    | 108.0660   | 125.3180   | 75.0639    | 9.0509     | 9.7027     |
| CE(26:0)   | 8.1109     | 9.3854     | 3.9783     | 4.4923     | 5.8754     | 2.9895     | 5.7247     | 11.2969    | 11.0424   | 31.5172    | 68.3882    | 121.2370   | 130.2530   | 77.6220    | 11.8729    | 12.4895    |
| CE(26:1)   | 120.0450   | 140.2680   | 38.0026    | 36.4151    | 7.8612     | 59.5440    | 56.3246    | 67.2757    | 50.2486   | 235.6000   | 18.4255    | 687.4200   | 886.6760   | 94.9100    | 81.1341    | 59.2224    |
| CE(26:2)   | 66.8083    | 82.2106    | 25.1418    | 22.2771    | 16.7389    | 37.3133    | 38.2126    | 37.7067    | 19.1857   | 116.8690   | 6.6316     | 414.1550   | 467.3350   | 57.8683    | 54.3740    | 32.3937    |
| CE(26:3)   | 161.2780   | 181.7990   | 63.8576    | 54.4639    | 38.0207    | 85.2274    | 86.2829    | 95.3494    | 51.3614   | 163.0300   | 33.7546    | 1168.3100  | 1341.1600  | 556.8660   | 88.6222    | 62.9678    |
| CE(26:4)   | 144.2160   | 198.8150   | 56.1251    | 57.2380    | 34.0231    | 80.9391    | 98.1120    | 68.4562    | 37.4094   | 108.9180   | 367.8090   | 819.7570   | 940.7730   | 10.6333    | 70.5879    | 52.9291    |
| CE(26:5)   | 412.3970   | 526.7460   | 112.3890   | 118.6730   | 113.9650   | 257.3260   | 259.3710   | 172.3250   | 54.0662   | 217.6150   | 155.6530   | 2489.2200  | 3251.4100  | 1335.6200  | 180.1730   | 88.1823    |
| CE(26:6)   | 861.1450   | 966.5430   | 163.5110   | 164.5050   | 232.8230   | 532.0170   | 531.3550   | 368.4860   | 80.7519   | 375.8850   | 1479.0900  | 4782.8200  | 5895.5300  | 522.8120   | 297.4660   | 120.2150   |
| CE(27:1)   | 12.5756    | 39.9602    | 15.1824    | 12.4333    | 9.1540     | 20.3750    | 24.1004    | 34.0551    | 23.6734   | 83.9308    | 147.6650   | 228.9930   | 232.9410   | 177.4840   | 23.0741    | 26.0281    |
| CE(27:2)   | 15.0308    | 24.0372    | 3.5243     | 3.5342     | 1.2012     | 5.3191     | 9.4262     | 7.3862     | 5.3649    | 32.5565    | 82.8210    | 100.0140   | 114.4150   | 58.4937    | 7.1508     | 9.4992     |
| CE(28:1)   | 18.2227    | 17.8383    | 6.2832     | 6.0154     | 4.0131     | 6.9367     | 8.4697     | 13.0958    | 14.6158   | 61.5514    | 142.3350   | 172.8840   | 193.8860   | 118.7870   | 15.3044    | 17.4321    |
| CE(28:2)   | 7.7690     | 9.4531     | 1.8082     | 1.5850     | 0.3851     | 3.3089     | 5.7389     | 2.1082     | 5.2333    | 21.7693    | 72.9580    | 115.8680   | 133.4220   | 65.2896    | 4.6814     | 6.7579     |
| CE(28:3)   | 13.9892    | 9.8295     | 4.7345     | 5.3547     | 4.3438     | 7.7845     | 7.5069     | 8.3865     | 6.7730    | 10.0608    | 56.1320    | 118.8950   | 146.8820   | 65.1184    | 8.5553     | 6.1893     |
| CE(28:6)   | 51.8328    | 80.1431    | 8.7222     | 11.3439    | 1.1880     | 50.0286    | 27.9146    | 27.9523    | 6.7092    | 35.3432    | 1.6447     | 516.0020   | 664.6800   | 18.4379    | 4.9067     | 11.5266    |
| CE(30:1)   | 3.8078     | 5.3007     | 3.2160     | 4.9018     | 2.2853     | 0.7458     | 2.6837     | 7.5057     | 5.8087    | 13.2495    | 0.3576     | 36.9998    | 47.9       |            |            |            |

# Supplementary Table S3

**Supplementary Table S3. Raw data from the lipidomic analysis of cholesterol ester-fatty acid species in the brain tissue of WT and *Abcd1* KO mice.**

| Phenotype  | WT 1      | WT 2      | WT 3      | WT 4      | WT 5      | WT 6      | KO 1      | KO 2      | KO 3      | KO 4      | KO 5      | KO 6      |
|------------|-----------|-----------|-----------|-----------|-----------|-----------|-----------|-----------|-----------|-----------|-----------|-----------|
| Metabolite |           |           |           |           |           |           |           |           |           |           |           |           |
| CE(14:0)   | 10.3896   | 11.3631   | 11.4830   | 14.0148   | 13.4745   | 12.2710   | 11.9395   | 11.1116   | 12.3518   | 12.1473   | 14.4328   | 14.4303   |
| CE(15:0)   | 11.2798   | 8.1506    | 5.5674    | 9.2299    | 8.3177    | 10.5368   | 9.3632    | 7.3938    | 6.2209    | 7.4070    | 7.4758    | 9.9618    |
| CE(16:0)   | 51.6107   | 51.8461   | 69.1106   | 60.0174   | 41.5529   | 68.5575   | 85.0761   | 42.5233   | 18.2893   | 36.1163   | 25.8172   | 41.7094   |
| CE(16:1)   | 50.1504   | 59.5356   | 55.2129   | 57.8222   | 45.4364   | 65.1593   | 78.6044   | 42.4079   | 44.4836   | 59.3209   | 37.7132   | 53.3904   |
| CE(16:2)   | 2.3677    | 1.5499    | 2.5066    | 1.4542    | 0.8992    | 1.2397    | 4.6116    | 0.5115    | N/A       | 1.4465    | 1.1653    | 1.5388    |
| CE(16:3)   | 5.8461    | 4.0196    | 7.3256    | 4.8367    | 2.6153    | 8.5842    | 8.8294    | 2.1079    | 0.7111    | 4.0882    | 1.2133    | 4.1912    |
| CE(18:0)   | 7.0084    | 4.7955    | 6.0407    | 5.7356    | 2.3307    | 7.8519    | 9.5552    | 3.4416    | 1.5837    | 3.6742    | 3.1998    | 4.3084    |
| CE(18:1)   | 577.5410  | 560.8730  | 629.5980  | 685.5360  | 438.2510  | 672.0250  | 944.7690  | 448.0770  | 295.3850  | 417.5380  | 352.3100  | 509.1570  |
| CE(18:2)   | 1579.1400 | 1048.8200 | 1022.7900 | 1049.3300 | 1022.4700 | 1228.2500 | 721.1490  | 1030.3100 | 1291.5200 | 1344.0400 | 1416.5300 | 1873.9000 |
| CE(18:3)   | 62.5835   | 48.5709   | 45.1199   | 54.0199   | 42.8631   | 51.0117   | 49.4175   | 45.3573   | 46.1130   | 57.8986   | 53.9265   | 73.3158   |
| CE(19:0)   | 2.1290    | 1.5570    | 1.8614    | 2.1300    | 0.9266    | 2.2280    | 2.3480    | 0.8431    | 0.8132    | 1.0402    | 1.0791    | 1.5204    |
| CE(19:1)   | 8.4155    | 8.4386    | 8.4111    | 10.4964   | 6.7760    | 11.7033   | 13.6277   | 6.0041    | 6.4709    | 6.3941    | 4.4636    | 7.4579    |
| CE(19:2)   | 53.3448   | 25.7700   | 36.8873   | 27.0799   | 37.4484   | 50.9957   | 16.8785   | 45.5488   | 62.0210   | 38.4234   | 59.9996   | 71.6632   |
| CE(19:3)   | 3.0074    | 1.3107    | 0.4909    | 2.3472    | 0.5668    | 3.0157    | 0.8107    | 3.0018    | 2.7826    | 3.4835    | 2.5361    | 5.7636    |
| CE(20:1)   | 36.3656   | 19.1393   | 20.4307   | 25.8407   | 11.8522   | 28.0238   | 36.9964   | 13.9865   | 8.9497    | 13.9984   | 15.2267   | 24.4213   |
| CE(20:2)   | 53.0685   | 33.5653   | 44.5556   | 37.5074   | 28.7605   | 38.6040   | 41.5531   | 35.1556   | 27.7141   | 26.2015   | 3.2962    | 42.2372   |
| CE(20:3)   | 197.7690  | 147.2700  | 197.6270  | 185.5930  | 119.7150  | 220.6830  | 207.5020  | 116.2020  | 117.6830  | 172.1020  | 118.5290  | 167.5510  |
| CE(20:4)   | 2317.2800 | 2171.2000 | 2089.3300 | 2516.9700 | 1663.0400 | 2152.4700 | 1860.5300 | 1761.1900 | 1873.8700 | 2338.9900 | 2107.1300 | 2801.8500 |
| CE(20:5)   | 131.2510  | 108.1180  | 141.3140  | 121.3570  | 79.4226   | 155.1610  | 143.3470  | 76.4806   | 74.1930   | 111.4340  | 60.1420   | 116.1000  |
| CE(21:1)   | 1.7646    | 0.9787    | 0.9581    | 1.4427    | 0.4608    | 1.5066    | 1.5194    | 0.7598    | 0.5834    | 0.5831    | 0.9522    | 1.1151    |
| CE(21:3)   | 3.3638    | 2.4399    | 3.1950    | 2.9537    | 1.9047    | 2.8167    | 2.9151    | 1.5255    | 1.7279    | 3.4317    | 2.4516    | 3.0376    |
| CE(21:4)   | 56.9262   | 50.1348   | 44.4128   | 46.2023   | 45.4795   | 56.7508   | 39.2479   | 50.0843   | 56.0943   | 48.3840   | 59.1500   | 74.7431   |
| CE(21:5)   | 5.4733    | 4.0287    | 4.7282    | 1.6743    | 3.5304    | 6.0490    | 1.8986    | 3.6957    | 4.2325    | 2.2027    | 1.9579    | 6.4666    |
| CE(22:1)   | 5.5100    | 2.9651    | 3.5119    | 3.9671    | 2.5443    | 3.9464    | 3.1145    | 2.8338    | 2.8070    | 3.4288    | 4.1517    | 5.2125    |
| CE(22:2)   | 3.3779    | 1.7415    | 2.0820    | 1.8264    | 1.3561    | 2.1185    | 2.2360    | 1.9959    | 1.0300    | 2.0699    | 2.2443    | 2.3954    |
| CE(22:3)   | 12.5502   | 6.3111    | 7.5512    | 5.9426    | 5.9912    | 8.4303    | 8.8591    | 6.1244    | 4.9815    | 6.2717    | 6.3847    | 7.8028    |
| CE(22:4)   | 235.2930  | 193.5790  | 260.6240  | 252.8610  | 147.7660  | 259.7860  | 374.5510  | 148.4760  | 102.4840  | 157.1450  | 118.6380  | 174.6250  |
| CE(22:5)   | 230.3570  | 147.3560  | 207.8000  | 184.6500  | 87.0441   | 246.4860  | 265.2060  | 89.1001   | 56.6415   | 127.5830  | 89.4179   | 179.7920  |
| CE(22:6)   | 3041.1300 | 2432.5700 | 3547.1800 | 3126.4100 | 1477.3500 | 3783.0300 | 3754.2400 | 1653.7800 | 879.3450  | 1974.2600 | 1657.4500 | 2697.4300 |
| CE(23:1)   | 2.3906    | 1.3912    | 1.0820    | 1.4934    | 0.6538    | 1.4895    | 1.5085    | 1.1638    | 0.7861    | 1.1062    | 1.3472    | 1.7897    |
| CE(23:5)   | 3.4448    | 2.2507    | 3.4172    | 2.1710    | 1.5172    | 4.0437    | 4.2455    | 1.9107    | 1.2253    | 1.5161    | 1.0499    | 3.6366    |
| CE(23:6)   | 35.0235   | 31.2719   | 43.8801   | 35.9008   | 22.4231   | 47.0751   | 45.6818   | 24.7624   | 15.7660   | 23.6807   | 23.4354   | 39.1349   |
| CE(24:0)   | 0.3987    | 0.3778    | 0.4836    | 0.2155    | 0.3837    | 0.2903    | 0.1614    | 0.6358    | 0.7758    | 1.0334    | 0.8296    | 0.9931    |
| CE(24:1)   | 7.7472    | 6.0774    | 5.7759    | 5.5071    | 4.2469    | 6.1497    | 6.0031    | 7.0594    | 7.2524    | 9.3927    | 10.8746   | 11.6959   |
| CE(24:2)   | 1.3816    | 0.7148    | 1.2218    | 1.0038    | 0.7836    | 1.0063    | 1.1625    | 1.4300    | 1.1804    | 1.4735    | 1.8380    | 2.4464    |
| CE(24:3)   | 1.2239    | 0.8386    | 0.8306    | 0.9378    | 0.8684    | 1.1079    | 0.8489    | 0.7088    | 0.6306    | 1.1703    | 1.2232    | 1.5675    |
| CE(24:4)   | 21.6194   | 8.5440    | 13.0893   | 8.9330    | 6.4961    | 17.7696   | 22.9491   | 5.9468    | 4.1163    | 8.7633    | 6.9574    | 10.4619   |
| CE(24:5)   | 45.8774   | 31.6606   | 55.7363   | 38.2021   | 21.8871   | 56.3519   | 86.6082   | 21.2911   | 11.3484   | 28.3760   | 19.3021   | 29.9169   |
| CE(24:6)   | 63.2579   | 39.7367   | 64.8949   | 55.4578   | 24.2084   | 78.3374   | 90.6438   | 24.9807   | 11.0362   | 27.8175   | 23.2143   | 44.1073   |
| CE(25:1)   | 0.7081    | 0.4790    | 1.0899    | 0.3498    | 0.4141    | 0.6665    | 0.8074    | 1.0677    | 1.2913    | 1.2497    | 2.6928    | 0.8934    |
| CE(25:4)   | 1.0781    | 0.5653    | 0.7537    | 0.6149    | 0.5663    | 0.8475    | 0.8817    | 0.4050    | 0.4402    | 0.7538    | 0.7362    | 0.8194    |
| CE(26:0)   | 0.1532    | 0.0413    | 0.0462    | 0.1140    | 0.1347    | 0.1478    | 0.5924    | 1.0440    | 0.5432    | 0.9867    | 0.6468    | 1.1108    |
| CE(26:1)   | 1.4324    | 0.7870    | 0.4081    | 0.5225    | 0.8056    | 1.2949    | 3.6321    | 2.5332    | 2.6545    | 4.1237    | 3.3585    | 4.1743    |
| CE(26:2)   | 0.2014    | 0.1287    | 0.1517    | N/A       | N/A       | 0.0956    | 0.3188    | 0.6823    | 0.2984    | 0.4124    | 0.3209    | 0.9520    |
| CE(26:4)   | 1.3437    | 1.1130    | 1.0202    | 0.9458    | 0.7178    | 1.1145    | 1.1510    | 1.1919    | 0.6923    | 0.9639    | 1.3083    | 1.3954    |
| CE(26:5)   | 2.0068    | 1.1178    | 1.4104    | 1.0687    | 0.9380    | 1.5670    | 2.1504    | 0.7880    | 0.7374    | 1.0804    | 0.9493    | 1.1178    |
| CE(26:6)   | 4.4405    | 2.4083    | 4.2152    | 2.7143    | 1.4502    | 4.7479    | 5.4805    | 1.7011    | 0.8145    | 2.2622    | 1.6666    | 2.8137    |

\*values represented as a ratio to internal standard

# Supplementary Table S4

**Supplementary Table S4. Raw data from the lipidomic analysis of cholesterol ester-fatty acid species in the spinal cord tissue of WT and *Abcd1* KO mice.**

| Phenotype  | WT 1      | WT 2      | WT 3      | WT 4      | WT 5      | WT 6     | KO 1      | KO 2      | KO 3      | KO 4     | KO 5     | KO 6      |
|------------|-----------|-----------|-----------|-----------|-----------|----------|-----------|-----------|-----------|----------|----------|-----------|
| Metabolite |           |           |           |           |           |          |           |           |           |          |          |           |
| CE(14:0)   | 5.9504    | 5.0152    | 6.7368    | 7.8825    | 3.5090    | 6.3873   | 6.7238    | 7.6141    | 9.8397    | 5.3606   | 2.7932   | 4.1618    |
| CE(15:0)   | 14.3717   | 8.7176    | 4.7923    | 11.6867   | 11.1615   | 18.1543  | 12.8208   | 16.2987   | 19.2521   | 13.1559  | 7.5366   | 16.3191   |
| CE(16:0)   | 9.1871    | 4.1887    | 10.0442   | 4.9257    | 8.8098    | 8.2684   | 4.9875    | 6.3290    | 3.4324    | 5.0627   | 8.2601   | 10.2674   |
| CE(16:1)   | 15.6930   | 23.6007   | 19.9298   | 15.3252   | 26.1694   | 16.4050  | 23.8388   | 14.9623   | 14.9696   | 16.4789  | 17.1327  | 33.2011   |
| CE(16:2)   | N/A       | N/A       | 0.4558    | N/A       | N/A       | N/A      | 0.2703    | N/A       | N/A       | 0.4943   | N/A      | N/A       |
| CE(16:3)   | N/A       | N/A       | N/A       | 0.3185    | N/A       | N/A      | N/A       | N/A       | N/A       | N/A      | N/A      | N/A       |
| CE(18:0)   | 1.2217    | 1.3270    | 1.5841    | 0.9321    | 1.7382    | 1.0751   | 1.1301    | 1.3642    | 1.7259    | 1.4061   | 2.3027   | 1.1878    |
| CE(18:1)   | 146.5850  | 182.1690  | 170.9200  | 131.5080  | 213.3400  | 147.7060 | 175.0200  | 164.3300  | 157.7260  | 153.3260 | 197.8830 | 238.7280  |
| CE(18:2)   | 1085.5500 | 1028.0900 | 842.3400  | 670.0250  | 1241.9300 | 755.5030 | 897.3150  | 1103.4000 | 914.5760  | 444.4670 | 947.9890 | 1507.0100 |
| CE(18:3)   | 35.1683   | 36.9514   | 27.3067   | 29.9680   | 37.1951   | 22.3762  | 36.5819   | 36.7779   | 32.6668   | 20.1315  | 28.9013  | 48.8367   |
| CE(19:0)   | N/A       | 0.1458    | 0.2258    | 0.0482    | 0.3256    | 0.0602   | N/A       | 0.0802    | N/A       | 0.0617   | 0.0678   | 0.2119    |
| CE(19:1)   | 2.2938    | 2.5345    | 2.8584    | 2.0908    | 2.9931    | 1.2502   | 1.3104    | 2.0974    | 1.5004    | 2.4600   | 2.1333   | 5.1387    |
| CE(19:2)   | 39.8477   | 30.5277   | 24.0948   | 14.6207   | 38.0690   | 24.6644  | 15.6756   | 33.2062   | 35.3707   | 6.7195   | 30.8246  | 47.4538   |
| CE(19:3)   | 1.7553    | 0.5807    | 0.2058    | 0.2458    | 0.7767    | 0.5553   | 0.8009    | 1.4926    | 1.4714    | 0.1815   | 0.5039   | 1.4874    |
| CE(20:1)   | 7.8295    | 8.4759    | 8.8817    | 7.1060    | 15.3938   | 7.4768   | 8.5927    | 10.5896   | 13.3771   | 7.6493   | 12.9788  | 13.8401   |
| CE(20:2)   | 15.9201   | 13.1074   | 18.5733   | 9.5564    | 27.4564   | 13.9907  | 15.6086   | 22.0694   | 16.0441   | 9.4487   | 23.2823  | 28.2443   |
| CE(20:3)   | 61.7535   | 74.4036   | 68.1342   | 51.9723   | 77.5587   | 56.8083  | 76.7994   | 59.6645   | 52.2163   | 43.4943  | 72.5810  | 104.9680  |
| CE(20:4)   | 1005.2000 | 1406.2700 | 1171.7200 | 1088.1400 | 1159.2900 | 970.5770 | 1163.1200 | 1283.7300 | 1052.3900 | 857.0750 | 960.2780 | 1268.7600 |
| CE(20:5)   | 26.5986   | 19.5191   | 25.0113   | 24.3055   | 20.4488   | 19.9293  | 48.2339   | 27.8801   | 27.5347   | 14.5068  | 17.9909  | 56.2040   |
| CE(21:1)   | 0.0760    | 0.3279    | 0.3354    | 0.0604    | 0.5366    | 0.0797   | N/A       | 0.3596    | 0.4648    | N/A      | 0.0584   | 0.1369    |
| CE(21:3)   | 0.6811    | 0.3023    | 0.3257    | 0.8679    | 0.7605    | 0.4028   | 0.7865    | 0.4900    | N/A       | 0.2985   | 0.7330   | 1.0961    |
| CE(21:4)   | 23.5953   | 27.6409   | 21.0684   | 13.6732   | 20.5537   | 20.2071  | 19.1855   | 29.6505   | 27.1177   | 10.1917  | 17.2323  | 30.5437   |
| CE(21:5)   | 1.7154    | 1.0323    | 0.7366    | 0.8237    | 1.0219    | 0.6302   | 0.4191    | 2.3838    | 1.3189    | N/A      | 0.6164   | 2.2291    |
| CE(22:1)   | 3.1827    | 2.8923    | 3.1343    | 2.9939    | 4.6947    | 3.3544   | 4.5978    | 4.9030    | 5.6044    | 3.3027   | 4.4465   | 5.5671    |
| CE(22:2)   | 0.8829    | 0.4334    | 1.1419    | 0.4649    | 1.1128    | 0.5487   | 1.2192    | 1.5425    | 0.7028    | 0.9012   | 1.4094   | 2.2677    |
| CE(22:3)   | 3.2260    | 2.3567    | 3.0051    | 1.6291    | 3.2024    | 1.8190   | 3.0201    | 4.0883    | 2.8258    | 3.0016   | 4.5087   | 5.5808    |
| CE(22:4)   | 57.5461   | 49.3771   | 70.0682   | 34.5320   | 58.9636   | 38.1218  | 53.5838   | 66.9497   | 62.3615   | 64.1496  | 76.8703  | 77.9020   |
| CE(22:5)   | 21.9684   | 24.0891   | 21.8576   | 15.6577   | 28.3142   | 14.5395  | 25.3514   | 25.3150   | 20.0170   | 19.9225  | 24.3967  | 37.3894   |
| CE(22:6)   | 398.0030  | 469.8940  | 424.6530  | 423.1130  | 414.7590  | 348.3750 | 424.6650  | 478.2510  | 382.2320  | 341.0420 | 352.0940 | 508.7500  |
| CE(23:1)   | 0.6277    | 0.0999    | 0.5516    | 0.6508    | 0.8039    | 0.3093   | 0.8963    | 0.5881    | 0.7243    | 0.6741   | 1.2031   | 1.5972    |
| CE(23:5)   | N/A       | N/A       | 0.1078    | N/A       | N/A       | N/A      | 0.1272    | N/A       | N/A       | N/A      | N/A      | N/A       |
| CE(23:6)   | 4.5600    | 6.5550    | 3.2380    | 2.4650    | 1.3360    | 4.3882   | 2.7293    | 6.0165    | 5.1973    | 2.9893   | 1.2932   | 8.2609    |
| CE(24:0)   | 0.4261    | 0.3676    | 0.4942    | 0.1286    | 0.6137    | 0.3355   | 0.9491    | 0.7251    | 0.4126    | 0.1918   | 0.6243   | 1.1065    |
| CE(24:1)   | 6.7753    | 3.5589    | 5.9907    | 4.5060    | 7.3649    | 4.6681   | 11.0791   | 12.3482   | 10.1131   | 7.6391   | 9.8719   | 11.6240   |
| CE(24:2)   | 1.2226    | 0.3597    | 1.0866    | 0.2762    | 1.0436    | 0.2489   | 2.2061    | 1.5712    | 0.7705    | 0.8660   | 1.6381   | 2.5888    |
| CE(24:3)   | 0.6358    | 0.3030    | 0.6132    | 0.2529    | 0.2880    | 0.2448   | 0.8873    | 1.1882    | 0.0948    | 0.4769   | 0.6371   | 1.1553    |
| CE(24:4)   | 3.9980    | 2.9632    | 5.4125    | 1.4373    | 2.9440    | 1.8735   | 3.6919    | 5.8766    | 3.0569    | 4.0344   | 5.8932   | 5.8673    |
| CE(24:5)   | 1.0307    | 2.1384    | 3.1268    | 1.7107    | 3.4732    | 2.2212   | 2.2683    | 3.7189    | 1.6950    | 2.7508   | 2.2538   | 4.3881    |
| CE(24:6)   | 4.7606    | 3.8379    | 3.2384    | 3.0072    | 4.5302    | 3.1389   | 2.9873    | 4.8540    | 2.6163    | 3.1658   | 5.1096   | 5.0074    |
| CE(25:1)   | 0.1621    | 0.2701    | 0.2771    | 0.3115    | 0.5517    | 0.0523   | 1.2435    | 1.3205    | 0.6002    | 1.0615   | 0.8969   | 0.6468    |
| CE(25:4)   | 0.2182    | 0.4568    | 0.2392    | 0.1328    | 0.3503    | 0.3265   | 0.3727    | 0.3371    | 0.1146    | 1.0319   | 0.3598   | 0.2397    |
| CE(26:0)   | N/A       | 0.0694    | N/A       | 0.1127    | 0.1699    | N/A      | 0.6976    | 0.7261    | 0.2993    | 0.2046   | 1.1719   | 0.3894    |
| CE(26:1)   | 0.7648    | 0.7163    | 0.7904    | 0.8990    | 0.8869    | 0.7655   | 4.0332    | 3.9178    | 3.2868    | 2.7386   | 3.4363   | 3.6231    |
| CE(26:2)   | 0.0803    | 0.0643    | 0.1360    | N/A       | N/A       | 0.1460   | 0.5035    | 0.9271    | 0.0830    | 0.4261   | 0.7066   | 0.3618    |
| CE(26:4)   | 0.8622    | 0.5844    | 0.7408    | 0.1300    | 0.1938    | 0.0811   | 1.5889    | 1.7319    | 0.6018    | 1.6570   | 1.8949   | 1.0269    |
| CE(26:5)   | 0.7313    | 0.1961    | 0.4168    | N/A       | 0.4146    | 0.1204   | 0.6610    | 0.5565    | N/A       | 0.6094   | 1.1240   | 0.7271    |
| CE(26:6)   | 0.1527    | 0.3923    | 0.2660    | 0.0956    | 0.1167    | 0.1523   | 0.2120    | 0.2449    | N/A       | 0.1693   | 0.1146   | 0.4692    |

\*values represented as a ratio to internal standard

## Supplementary Table S5

**Supplementary Table S5. *P*-values of *t*-tests comparing the effect of cholesterol condition on gene expression within the control and X-ALD genotype groups.**

| Gene                       | LDM <i>vs</i> complete medium* | LDM <i>vs</i> LDM+chol* | Complete medium <i>vs</i> LDM+chol * |
|----------------------------|--------------------------------|-------------------------|--------------------------------------|
| <b>Control fibroblasts</b> |                                |                         |                                      |
| <i>HMGCR</i>               | p<0.0001                       | p<0.0001                | p=0.0050                             |
| <i>SOAT1</i>               | p=0.0767                       | p=0.0029                | p=0.0637                             |
| <i>NCEH1</i>               | p=0.4960                       | p=0.3147                | p=0.7375                             |
| <i>ABCA1</i>               | p=0.0045                       | p=0.0005                | p=0.0013                             |
| <b>X-ALD fibroblasts</b>   |                                |                         |                                      |
| <i>HMGCR</i>               | p=0.0023                       | p=0.0009                | p=0.0001                             |
| <i>SOAT1</i>               | p=0.9731                       | p=0.5754                | p=0.4919                             |
| <i>NCEH1</i>               | p=0.5367                       | p=0.8286                | p=0.7155                             |
| <i>ABCA1</i>               | p=0.0065                       | p=0.0020                | p=0.0014                             |

\* Complete medium, standard RPMI with 10% FBS; LDM, RPMI with 10% lipid-depleted FBS; LDM+chol, LDM with 10 µg/ml cholesterol

## Supplementary Figure S1

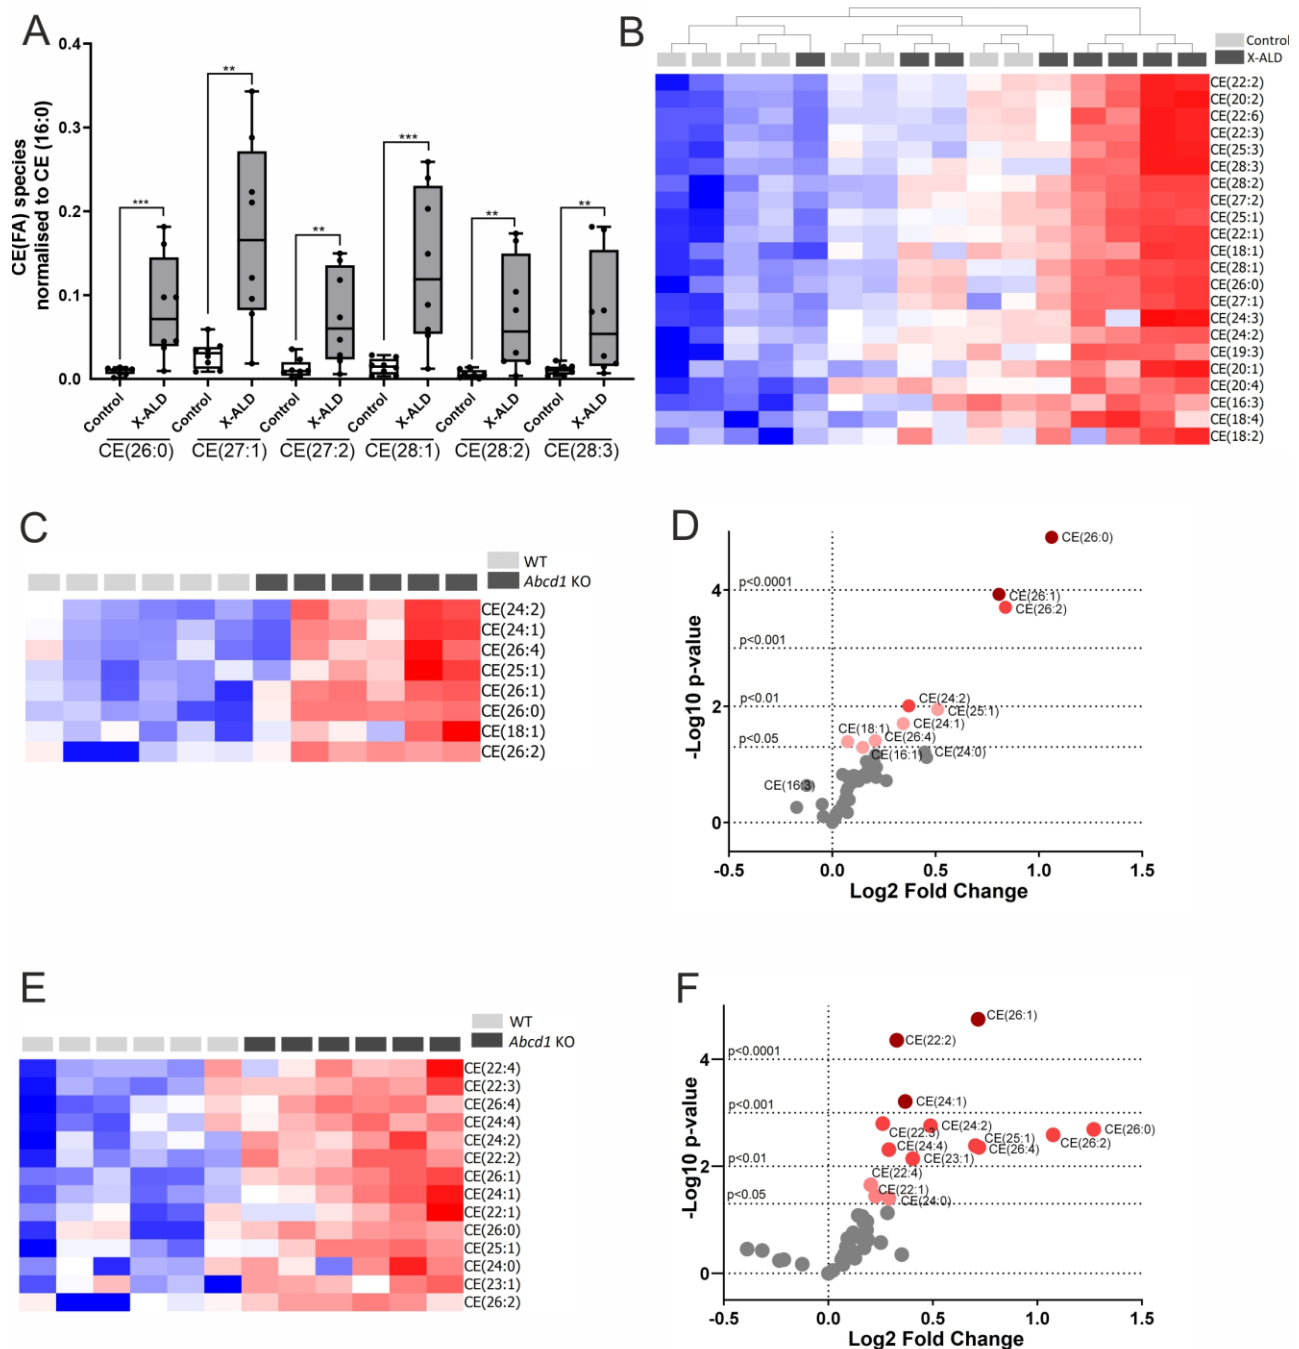

**Supplementary Figure S1. Lipidomic analysis of cholesterol ester-fatty acid species in human control and X-ALD fibroblasts and in the CNS of WT and *Abcd1* KO mice.** (A) Relative levels of the top six significantly altered CE(FA)s normalised to CE(16:0) and (B) heat map depicting all significantly different CE(FA)s in X-ALD vs control fibroblasts ( $n=8$  each). (C) Heat map and (D) volcano plot depicting significantly different CE(FA)s in the brain of *Abcd1* KO vs WT mice ( $n=6$  each). (E) Heat map and (F) volcano plot depicting significantly different CE(FA)s in the spinal cord of *Abcd1* KO vs WT mice ( $n=6$  each). Qlucose Omics Explorer 3.5 software was used to analyse the data and generate the heat maps.  $P$ -values and  $\log_2$ -fold change values obtained from the Qlucose software (after performing two group comparison test) were used to create volcano plots in GraphPad Prism 8. \*  $p < 0.05$ ; \*\*  $p < 0.01$ ; \*\*\*  $p < 0.001$ .

## Supplementary Figure S2

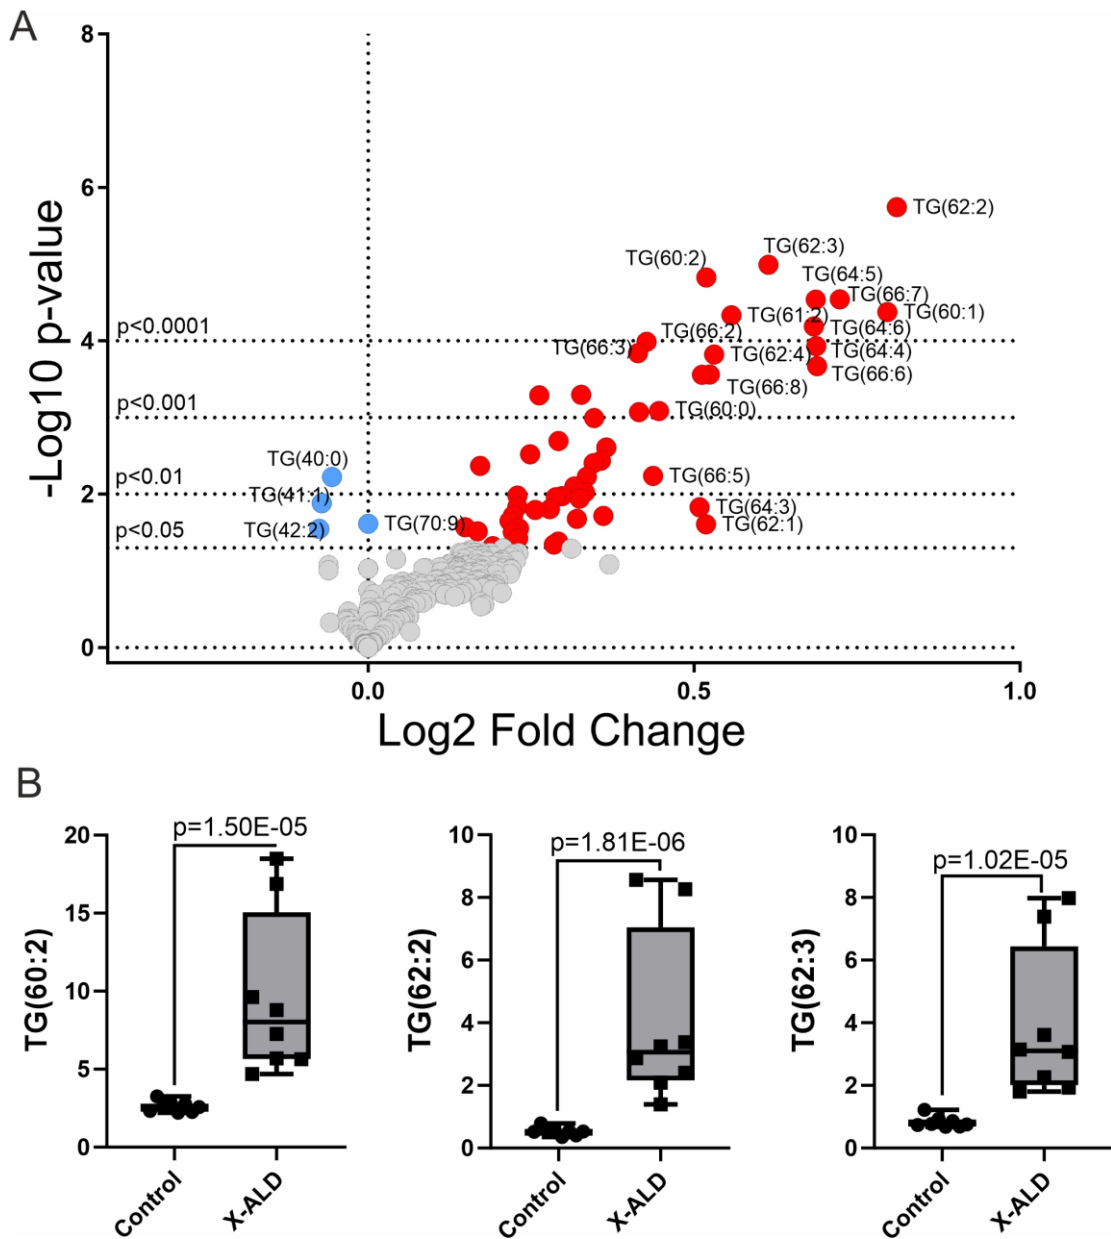

**Supplementary Figure S2. Lipidomic analysis of triglyceride-fatty acid species in human control and X-ALD fibroblasts.** (A) Volcano plot depicting significantly different TG(FA)s (normalised to the internal standard) between control and X-ALD fibroblasts ( $n=8$  each). (B) Top three significantly altered TG(FA) in X-ALD vs control fibroblasts ( $n=8$  each). In (B), values represent the ratios to the internal standard. Qlucore Omics Explorer 3.5 software was used to analyse the data.  $P$ -values and/or  $\log_2$ -fold change values obtained from the Qlucore software (after performing a two-group comparison test) were used to create volcano plots in GraphPad Prism 8.

## Supplementary Figure S3

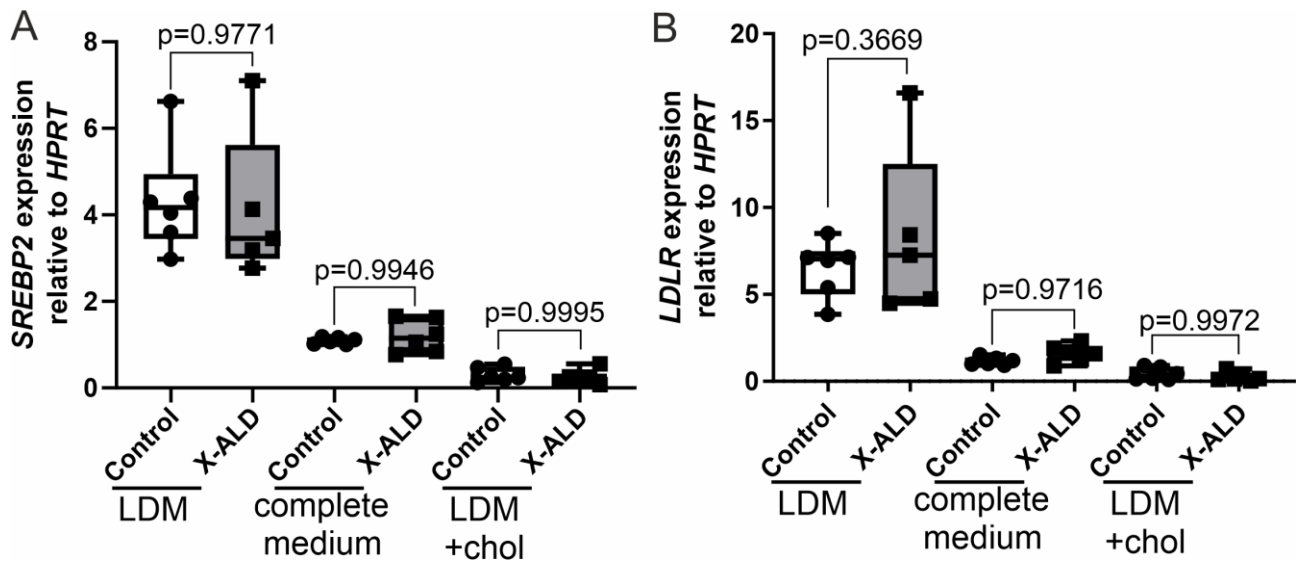

**Supplementary Figure S3. Cholesterol triggers proper regulation of the SREBP2 pathway in control and X-ALD fibroblasts at the mRNA level.** (A, B) Primary fibroblasts derived from healthy controls or X-ALD patients ( $n=6$  each) were cultivated in lipid-depleted medium (LDM), complete RPMI medium or LDM supplemented with 10  $\mu\text{g/ml}$  cholesterol for 5 days (medium was refreshed after 48 h). The mRNA levels of *SREBP2* (A) and its transcriptional target, *LDLR* (B), were determined by RT-qPCR relative to *HPRT*. The data are depicted as box plots displaying all values and the median. One-way ANOVA with Sidak's multiple comparisons test was performed for statistical analysis of the data.

## Supplementary Figure S4

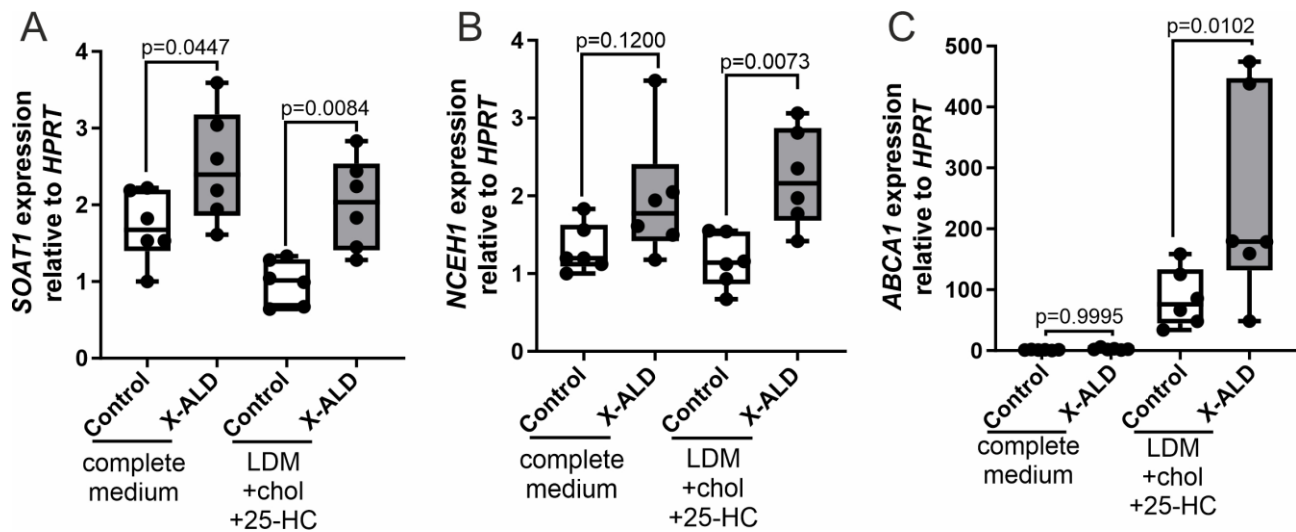

**Supplementary Figure S4. Dysregulated cholesterol-associated gene expression in X-ALD is aggravated by combined cholesterol and 25-HC exposure.** (A-C) Primary fibroblasts derived from healthy controls or X-ALD patients ( $n=6$  each) were cultivated in complete RPMI medium or lipid-depleted medium (LDM) supplemented with 10  $\mu\text{g/ml}$  cholesterol and 1  $\mu\text{g/ml}$  25-hydroxy cholesterol (25-HC) for 5 days (medium was refreshed after 48 h). The mRNA levels of *SOAT1* (A), *NCEH1* (B) and *ABCA1* (C) were determined by RT-qPCR relative to *HPRT*. The data are depicted as box plots displaying all values and the median. One-way ANOVA with Sidak's multiple comparisons test was performed for statistical analysis of the data.

## Supplementary Figure S5

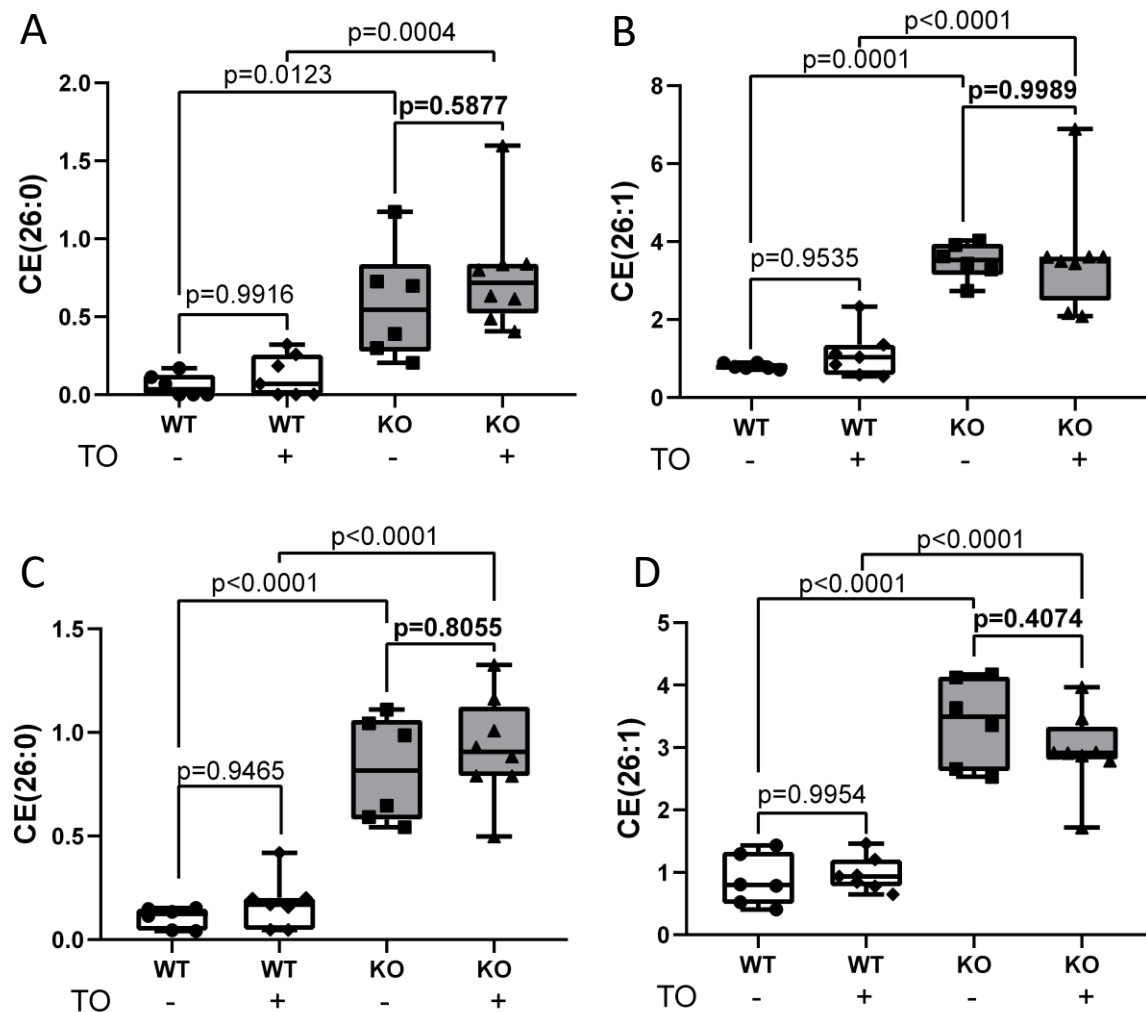

**Supplementary Figure S5. LXR agonist TO901317 does not reduce the levels of the most significantly accumulating CE-VLCFA species, CE(26:0) and CE(26:1), in the CNS of X-ALD mice.** (A-D) WT ( $n=7$ ) and *Abcd1* KO ( $n=8$ ) mice received chow supplemented with 100 mg/kg TO901317 (TO) for 10 weeks; alternatively, WT ( $n=6$ ) and *Abcd1* KO ( $n=6$ ) were fed a normal diet. At the treatment endpoint, mice were sacrificed for lipidomic analysis of the brain (A) CE(26:0) and (B) CE(26:1) levels in the spinal cord and (C) CE(26:0) and (D) CE(26:1) levels in brain tissue of TO treated or untreated WT *Abcd1* KO mice. The data are depicted as box plots displaying all values and the median. One-way ANOVA with Sidak's multiple comparisons test was performed for statistical analysis of the data.

Supplementary Figure S6

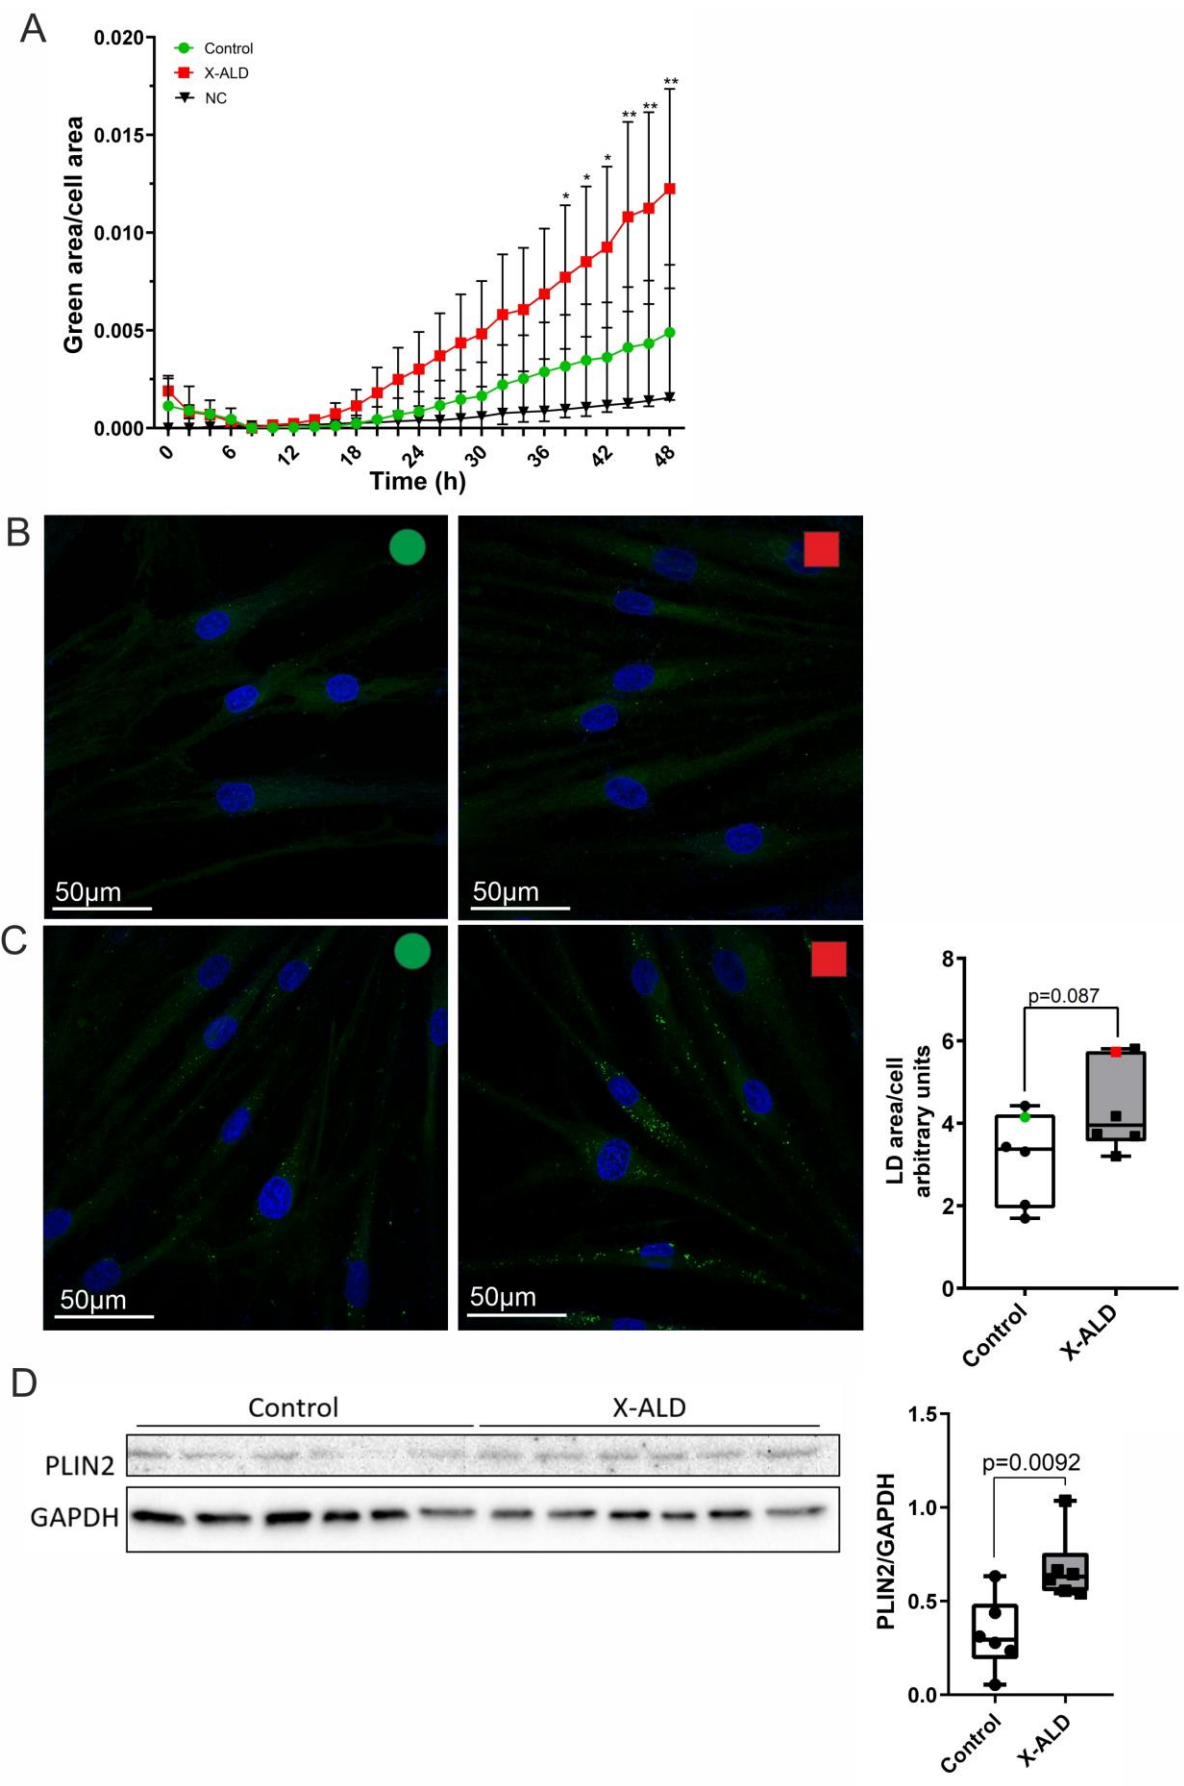

**Supplementary Figure S6. Increased induction of LDs is manifest in X-ALD fibroblasts already after 24 h of cholesterol loading.** (A–D) Control and X-ALD-derived primary human ( $n=6$  each) fibroblasts were starved for 72 h in lipid-depleted medium (LDM) and then incubated for 24 or 48 h with 20  $\mu\text{g/ml}$  cholesterol (in LDM). (A) The time course of cholesterol-induced LD formation was measured by using the neutral lipid stain BODIPY<sup>TM</sup> 493/503 and Incucyte® live imaging. Results are expressed as green fluorescent area/cell area. NC, normal control fibroblast line cultured in LDM with BODIPY<sup>TM</sup> 493/503 and EtOH (vehicle). Confocal microscopy pictures of control (left panel) and X-ALD (middle panel) cells cultured in LDM for 72 h (B), treated next for 24 h with 20  $\mu\text{g/ml}$  cholesterol (C) and stained with BODIPY<sup>TM</sup> 493/503 (LDs, green fluorescence) and DAPI (nuclei, blue). The summary statistics (right panel) show the results as LD area per cell. The data points for the samples shown to the left are colour-coded in the box plots. (D) Immunoblot analysis of perilipin 2 (PLIN2) protein expression after 24 h of 20  $\mu\text{g/ml}$  cholesterol treatment. The relative levels of PLIN2 normalised to GAPDH are displayed to the right. In A, the data are depicted as mean  $\pm$  SD; two-way ANOVA with Dunnett's multiple comparisons test (\*  $p < 0.05$ ; \*\*  $p < 0.01$ ). In C and D, the box plots show all values and the median; unpaired two-sided Student's t-test.

# Supplementary Figure S7

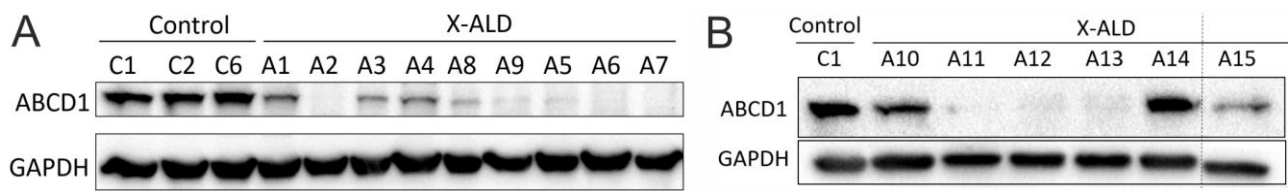

**Supplementary Figure S7. ABCD1 protein levels in various X-ALD-derived fibroblast lines.** Representative immunoblots of ABCD1 protein and, for normalisation, GAPDH expression in three control and 15 X-ALD primary fibroblast lines (**A**, **B**). A dashed line indicates a cut in the image.

## Supplementary Figure S8

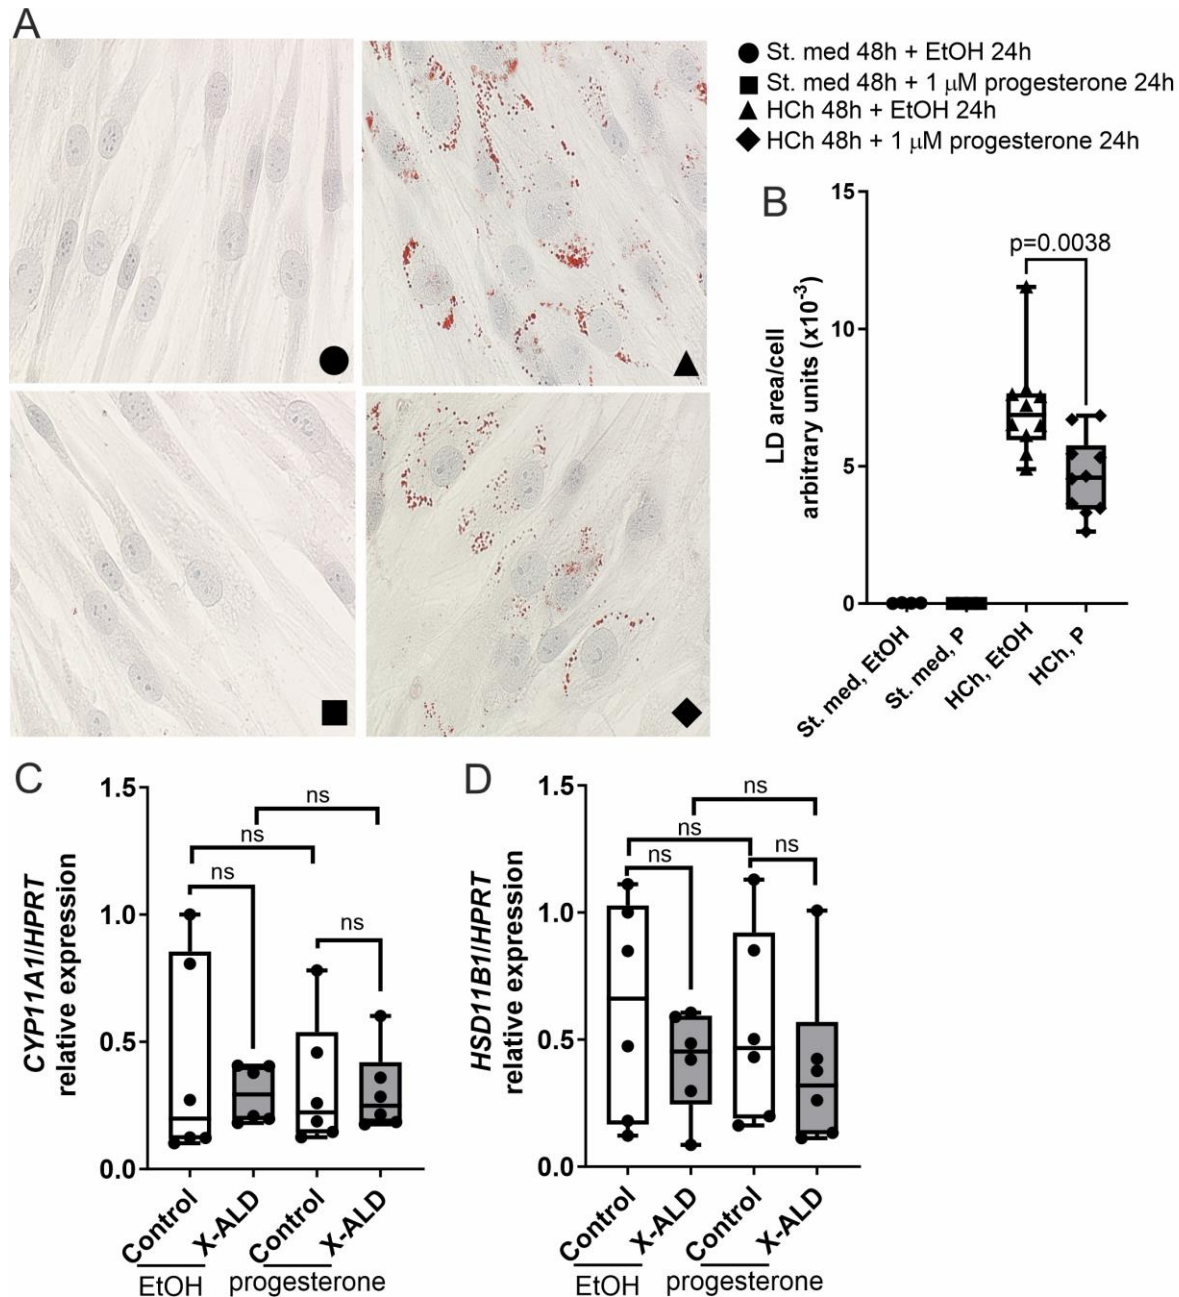

**Supplementary Figure S8. Progesterone triggers LD lipolysis in fibroblasts without affecting the expression of genes associated with the cortisol pathway.** (A, B) A human control fibroblast line was cultured for 48 h in a complete RPMI medium (St. med) or LDM supplemented with 20  $\mu$ g/ml cholesterol (HCh) to induce LDs. Subsequently, cells were treated for 24 h with 1  $\mu$ M progesterone (P) or vehicle (EtOH) followed by ORO staining to visualise LDs. (A) Representative light microscopy pictures of ORO-stained cells from all culture conditions. (B) For quantification of the cellular LD content, ten randomly chosen pictures were analysed per condition and plotted as stained area per cell. (C, D) Control and X-ALD fibroblasts ( $n=6$  each) in complete RPMI medium were treated for 24 h with 1  $\mu$ M progesterone or vehicle (EtOH) before harvesting the cells for RT-qPCR analysis of gene expression involved in the cortisol pathway. The relative mRNA levels of *CYP11A* (C) and *HSD11B1* (D) were normalised to that of *HPRT*. In B-D, the box plots show all values and the median, one-way ANOVA with Tukey's multiple comparison test.
